# Supplementary material
Source: publisher site journal article supplement (https://www.dovepress.com/article/403145)
Supplement: Supplementary file 1 [file get_supplementary_file.php]

**S1 Checklist. Preferred Reporting Items for Systematic reviews and Meta-Analyses extension for Scoping Reviews (PRISMA-ScR) Checklist**

| **SECTION** | **ITEM** | **PRISMA-ScR CHECKLIST ITEM** | **REPORTED ON PAGE #** |
| --- | --- | --- | --- |
| **TITLE** | | | |
| Title | 1 | Effective coverage of emergency obstetric and newborn care services and associated factors in Africa: a scoping review | 1 |
| **ABSTRACT** | | | |
| Structured summary | 2 | Abstract provided | 2 |
| **INTRODUCTION** | | | |
| Rationale | 3 | this review will help policymakers, researchers, and stakeholders undertake evidence-based decisions on EmONC services to improve Africa’s maternal and neonatal health and well-being. | 4 |
| Objectives | 4 | - What is the level of EC of EmONC services in Africa? - What is the level of quality of EmONC services in Africa? - What are health facility-related factors associated with the utilization of quality EmONC services in Africa? - What are maternal behavioral factors related to using quality EmONC services in Africa? - What are sociodemographic factors associated with the utilization of quality EmONC services in Africa? | 5 |
| **METHODS** | | | |
| Protocol and registration | 5 | The review protocol was registered on the Open Science Framework (OSF) on 27 August 2021 (https://osf.io/khcte/) | 2 |
| Eligibility criteria | 6 | - Studies presenting evidence of EC of Emergency Obstetric and Neonatal Care (EmONC) services - Studies showing evidence of the quality of EmONC services - Studies conducted in African countries - Studies published in the English language - Studies published on or after Jan 01, 2011 (Jan 01, 2011 – Dec 31, 2020) - Studies published in peer-reviewed journals or grey literature with extractable primary research data with qualitative research, randomized controlled trials, non-randomized studies, quantitative descriptive studies, and mixed methods studies | 6 |
| Information sources* | 7 | The investigators used PubMed, Web of Science, Google Scholar, and Scopus to search for published evidence. The WHO, Demographic and Health Survey (DHS) reports and other international organizations’ websites were searched for relevant grey literature. | 5 |
| Search | 8 | Search strategy provided | 5 |
| Selection of sources of evidence† | 9 | This review was conducted using the three stages. In the first stage, the principal investigator did a title screening, removed the duplicates, and exported the studies to Endnote 20. Two independent reviewers used the eligibility criteria in the second and third stages to do abstract and full-article screenings. When the studies were not accessible, investigators attempted to contact the authors and the University of KwaZulu-Natal library service. The third reviewer’s decision was accepted to resolve any disagreement arising at the abstract screening stage. | 6 |
| Data charting process‡ | 10 | A customized data charting table was developed and used for the review. | 7 & 25-30 (Table 2) |
| Data items | 11 | 1. Author 2. Publication year 3. Country 4. Aim 5. Study design/setting 6. Target group 7. Sample size 8. Data collection methods | 25-30 |
| Critical appraisal of individual sources of evidence§ | 12 | The selected studies’ quality was assessed using the Mixed Methods Appraisal Tool (MMAT) 2018 version. This tool helped the investigators evaluate the quality of different study designs in terms of appropriateness of the study’s aim, methods, study design, study participant selection, data collection, analysis, discussion, and conclusion. | 6-7 |
| Synthesis of results | 13 | This scoping review used the Preferred Reporting Items for Systematic Reviews and Meta-Analyses (PRISMA) Extension for Scoping Reviews (PRISMA-ScR) checklist. The review presented a numerical summary description at each stage of the PRISMA flow diagram. The charting and appraisal tools’ findings were summarized and presented in tabular form using the respective tools’ categories.  The investigators presented a summarized diagrammatic presentation of eligible articles’ major characteristics, such as the study’s characteristics, including geographic location, design, data collection techniques, and target populations. The relevancy of data for the research question on factors affecting the quality of EmONC services was presented for each evidence source and sorted by the data’s perspective. The investigators have also undergone thematic analysis to summarize the results based on themes from the extracted data. | 7 |
| **RESULTS** | | | |
| Selection of sources of evidence | 14 | Provided with a PRISMA 2009 Flow Diagram | Page 8 and Figure 1 |
| Characteristics of sources of evidence | 15 | Provided in data charting table | 25-30 (Table 2) |
| Critical appraisal within sources of evidence | 16 | The selected studies’ quality was assessed using the Mixed Methods Appraisal Tool (MMAT) 2018 version. This tool helped the investigators evaluate the quality of different study designs in terms of appropriateness of the study’s aim, methods, study design, study participant selection, data collection, analysis, discussion, and conclusion. | 6-7 |
| Results of individual sources of evidence | 17 | Provided in data charting table | 25-30 |
| Synthesis of results | 18 | The synthesis of the result was summarized and presented in the result section. | 8-14 |
| **DISCUSSION** | | | |
| Summary of evidence | 19 | This review mapped evidence of EC of EmONC services and factors affecting the quality of services. It revealed a great diversity in the availability of evidence on crude coverage, quality of care, and associated factors. Furthermore, the findings indicated that the evidence of the EC of EmONC services lacked comprehensiveness in Africa. | 14 |
| Limitations | 20 | This study only includes studies published in English, so studies published in other languages were excluded from the review despite their significance to the study's scope. | 16 |
| Conclusions | 21 | Despite its rising significance, evidence of EC of EmONC services lacks comprehensiveness in Africa. However, the review explored evidence on crude coverage and quality of EmONC services with a wide variability across studies, study period, and sub-national administrative structures. The utilization of EmONC services was far below the WHO-recommended 100% in all studies, though some reported a progressive improvement. The variation in the quality of EmONC services and assessment techniques was observed in the review, which has shown wide disparity across studies. In addition to the scarcity of evidence on the structural quality of EmONC services in Africa, the review explored the inadequacy of structural quality, particularly essential drugs, and equipment. Furthermore, despite their drawbacks, the perceived quality and CFRs were widely researched in the review, while very few studies assessed the content of care for EmONC service quality.  The perceived quality of EmONC services has shown a variable level (very low to high). However, the methodological and analytical inconsistencies across studies ultimately resulted in difficult comparability of the results, implying the need for uniform (harmonized) techniques. The high CFRs in the review indicated the low outcome quality of EmONC services. However, studies did not complement their results with other assessment techniques since lower CFRs do not necessarily mean better quality. The review further explored and identified sociodemographic, maternal behavioral, and health service utilization-related factors influencing the utilization of quality EmONC services in Africa. | 16-17 |
| **FUNDING** | | | |
| Funding | 22 | No funding has been obtained for this study | 18 |

JBI = Joanna Briggs Institute; PRISMA-ScR = Preferred Reporting Items for Systematic reviews and Meta-Analyses extension for Scoping Reviews.

* Where *sources of evidence* (see second footnote) are compiled from, such as bibliographic databases, social media platforms, and Web sites.

† A more inclusive/heterogeneous term used to account for the different types of evidence or data sources (e.g., quantitative and/or qualitative research, expert opinion, and policy documents) that may be eligible in a scoping review as opposed to only studies. This is not to be confused with *information sources* (see first footnote).

‡ The frameworks by Arksey and O’Malley (6) and Levac and colleagues (7) and the JBI guidance (4, 5) refer to the process of data extraction in a scoping review as data charting*.*

§The process of systematically examining research evidence to assess its validity, results, and relevance before using it to inform a decision. This term is used for items 12 and 19 instead of "risk of bias" (which is more applicable to systematic reviews of interventions) to include and acknowledge the various sources of evidence that may be used in a scoping review (e.g., quantitative and/or qualitative research, expert opinion, and policy document).

*From:* Tricco AC, Lillie E, Zarin W, O'Brien KK, Colquhoun H, Levac D, et al. PRISMA Extension for Scoping Reviews (PRISMAScR): Checklist and Explanation. Ann Intern Med. 2018;169:467–473. [doi: 10.7326/M18-0850](http://annals.org/aim/fullarticle/2700389/prisma-extension-scoping-reviews-prisma-scr-checklist-explanation).
